# Closed microbial communities self-organize to persistently cycle carbon

Summary: Closed microbial communities of algae and bacteria self-organize to robustly cycle carbon via emergent metabolite exchange.

Luis Miguel de Jesús Astacio,<sup>1,2,\*</sup> Kaumudi H. Prabhakara,<sup>1,2,3,4\*</sup>  
Zeqian Li<sup>1,2,3,4</sup>, Harry Mickalide<sup>1,2</sup> and Seppe Kuehn<sup>1,2,3,4†</sup>

<sup>1</sup>Center for the Physics of Living Cells, University of Illinois at Urbana-Champaign, Urbana, IL 61801

<sup>2</sup> Department of Physics, University of Illinois at Urbana-Champaign. Urbana, IL 61801

<sup>3</sup>(July 1, 2020) Center for the Physics of Evolving Systems. University of Chicago. Chicago, IL 60637

<sup>4</sup>(July 1, 2020) Department of Ecology and Evolution. University of Chicago. Chicago, IL 60637

\*These authors contributed equally to this work.

† To whom correspondence should be addressed email: [seppe.kuehn@gmail.com](mailto:seppe.kuehn@gmail.com)

**Nutrient cycling is an emergent property of ecosystems at all scales, from microbial communities to the entire biosphere. Understanding how nutrient cycles emerge from the collective metabolism of ecosystems is a challenging problem. Here we use closed microbial ecosystems (CES), hermetically sealed consortia that sustain nutrient cycles when provided with only light, to learn how microbial communities cycle carbon. A new technique for quantifying carbon exchange shows that CES comprised of an alga and diverse bacteria self-organize to robustly cycle carbon. Comparing a library of CES, we find that carbon cycling does not depend strongly on the taxonomy of the bacteria**

15        **present. Metabolic profiling reveals functional redundancy across CES: de-**  
16        **spite strong taxonomic differences, self-organized CES exhibit a conserved set**  
17        **of metabolic capabilities.**

18        Nutrient cycles are a defining emergent property of ecosystems at all scales. Ecosystem  
19        persistence relies on nutrient cycles to continuously replenish resources. As a result, global  
20        cycles of carbon (1) and nitrogen (2) are key organizing processes of life across the planet. In  
21        microbial communities nutrient cycling is also an key functional process, from carbon fixation  
22        and respiration in microbial mats (3), to denitrification and nitrogen fixation in soils (4), sul-  
23        phur cycling in anaerobic marine microbial communities (5), and nutrient cycling in periphytic  
24        consortia (6).

25        The fact that nutrient cycling is an essential feature of ecosystems means that a key problem  
26        in ecology is understanding how the cyclic flow of nutrients emerges from interactions between  
27        organisms in communities (7). Microbial communities, owing to their small size, rapid repli-  
28        cation rates and tractability in the laboratory, are powerful model systems for discovering the  
29        principles governing ecosystem organization and function. For example, a conserved succes-  
30        sion of bacteria with predictable metabolic capabilities describes the degradation of particulate  
31        organic carbon in marine microbial communities (8). Complex bacterial communities propa-  
32        gated in the laboratory reveal emergent cross-feeding between predictable taxa (9), and simple  
33        assembly rules govern the stable composition of synthetic communities (10).

34        However, few quantitative studies have exploited the advantages of microbial communities  
35        in the laboratory to uncover the principles governing nutrient cycling. A primary roadblock to  
36        studying nutrient cycling in model microbial communities is experimental: most existing ap-  
37        proaches use batch (9) or continuous culture (11), where nutrients are supplied externally. In  
38        these conditions, with few exceptions (12, 13), nutrient cycling rarely occurs since the external  
39        supply of nutrients favors those strains that can most rapidly exploit the supplied resource (8, 9).

40 The continuous dilution of these systems means that slower growing taxa are quickly washed  
41 out of the system (14), frequently resulting in the assembly of communities with taxa that ei-  
42 ther exploit the primary resource or are sustained via strong mutualistic or commensal interac-  
43 tions (9, 15). In contrast, nutrient cycling means that not all nutrients are supplied exogenously,  
44 but instead that some nutrients are regenerated by the community itself. Stable nutrient cycling  
45 therefore requires a balance between the production of byproducts (e.g. CO<sub>2</sub> by respiration)  
46 and their consumption (CO<sub>2</sub> fixation by photosynthesis) in a closed loop. Here we seek to de-  
47 velop microbial communities as model systems to understand how communities are organized  
48 to cycle nutrients.

49 To address this problem, we built on the work of Folsome (16), Taub (17) and others to de-  
50 velop closed microbial ecosystems (CES) as models for understanding the principles of emer-  
51 gent nutrient cycling. CES are milliliter-scale aquatic communities which are hermetically  
52 sealed and illuminated (16–20). Since no nutrients enter or leave a CES after assembly, persis-  
53 tence in these communities requires that nutrient cycles be sustained through photosynthesis.  
54 Complex CES have been shown to retain biological activity for decades in some cases (20). As  
55 such, CES are ideal model microbial ecosystems for understanding nutrient cycling (21). How-  
56 ever, most work on CES to date has focused on applications to spaceflight (22) or population  
57 dynamics (19, 23, 24) rather than understanding the emergent organization of ecosystems that  
58 cycle nutrients.

59 Here we take a top-down approach (9, 16) to assemble a library of CES, comprising diverse  
60 bacterial consortia and a single algal species. We present a new, high-precision, method for  
61 quantifying carbon cycling *in situ* to show that our CES rapidly and persistently cycle carbon.  
62 We utilize sequencing and metabolic profiling to reveal the conserved features of CES that cycle  
63 carbon.

64 Carbon cycling arises in a CES from the complementary reactions of photosynthesis and res-

65 piration, which consume (produce) and produce (consume) CO<sub>2</sub> and O<sub>2</sub>, respectively (Figure  
66 1A). Carbon cycling emerges from the photosynthetic conversion of CO<sub>2</sub> into organic carbon  
67 which is then either excreted by phototrophic microbes (25) or made available to bacterial de-  
68 composers via death of primary producers. The subsequent respiration of organic carbon by  
69 bacterial community members produces CO<sub>2</sub>, completing the cycle.

70 Carbon cycling can be quantified by continuously measuring O<sub>2</sub> or CO<sub>2</sub> production and con-  
71 sumption in a CES subjected to cycles of light and dark (17). The dependence of photosynthetic  
72 O<sub>2</sub> production (CO<sub>2</sub> fixation) on light means that diel cycles of light and dark result in oscilla-  
73 tions in O<sub>2</sub> and CO<sub>2</sub> levels (Figure 1B). To estimate carbon cycling rates from measurements  
74 of O<sub>2</sub> or CO<sub>2</sub> dynamics, one measures the rate of respiration during the dark phase ( $r$ , Figure  
75 1B,D). We then assume that this rate is sustained during the light period, allowing us to com-  
76 pute the total CO<sub>2</sub> produced during a light-dark cycle. The amount of CO<sub>2</sub> fixed during the light  
77 phase can then be computed by measuring the net oxygen production (CO<sub>2</sub> fixed,  $f$ , Figure 1B)  
78 during the light phase and using the respiration rate to infer a total CO<sub>2</sub> fixed (Supplementary  
79 Appendix). The quantity of carbon cycled over a light-dark cycle is then the number of moles  
80 of inorganic carbon both fixed and produced. Assuming fixed photosynthetic and respiratory  
81 quotients (ratio of O<sub>2</sub> production (consumption) to CO<sub>2</sub> consumption (production)) allows car-  
82 bon cycling to be quantified by measuring either O<sub>2</sub> or CO<sub>2</sub> dynamics. Obenhuber and Folsome  
83 have shown that the 30-fold lower solubility of O<sub>2</sub> relative to CO<sub>2</sub> in water results in oscilla-  
84 tions in pressure in a sealed vessel which are proportional to changes in O<sub>2</sub> and therefore CO<sub>2</sub>  
85 in the community (16). Similar methods are used to measure primary production in aquatic  
86 ecosystems in the wild (26).

87 We developed a custom culture device to precisely measure changes in pressure in a CES  
88 subjected to cycles of light and dark. A schematic is shown in Figure 1C. Each device housed  
89 a 20 mL CES in a 40 mL glass vial. The cap of the hermetically sealed vial was fitted with a

90 high-precision low-cost, pressure sensor developed for mobile devices (Bosch, BME280). In  
91 contrast to direct detection of O<sub>2</sub> or CO<sub>2</sub>, pressure measurements are higher sensitivity, lower  
92 cost, require no calibration, do not consume analyte and are stable for months. The vial was  
93 illuminated from below by a light-emitting diode (LED) and fit in a metal block which was held  
94 under feedback temperature control via a thermoelectric heating-cooling element (27). When  
95 we subjected the CES housed in our devices to cycles of light and dark (12 h-12 h), we observed  
96 increases and decreases in pressure, as expected (Figure 1D). The respiration rate ( $r$ ) and net  
97 productivity  $f$  can be quantified directly from these continuous pressure measurements. The  
98 rate of carbon cycling in our CES is proportional to the amplitude of the light-driven pressure  
99 oscillations (Supplementary Appendix). Performing the same experiment with only water in the  
100 vial resulted in no pressure oscillations as expected (Figure S1), and concurrent measurements  
101 of O<sub>2</sub> and pressure in the vial confirmed that pressure changes reflected the production and  
102 consumption of O<sub>2</sub> and therefore CO<sub>2</sub> (Figures S2-S3).

103 Using these devices, we initially measured carbon cycling in variants of a previously stud-  
104 ied synthetic CES (23, 24) comprised of *Chlamydomonas reinhardtii* (UTEX 2244, mt+) and  
105 *Escherichia coli* (MG1655) over periods of several weeks. We found that these simple synthetic  
106 communities failed to persistently cycle carbon (Figure 2C, Figure S4). We speculate that this  
107 failure arose from the production of starch by the algae (28) which cannot be utilized by *E.*  
108 *coli*. We reasoned that increasing the metabolic diversity of the bacterial component of our  
109 CES might improve carbon cycling. To accomplish this, we turned to a top-down community  
110 assembly approach (9, 11) outlined in Figure 2A.

111 To assemble communities, we sampled local soils, removed eukaryotes by applying drugs,  
112 and extracted bacterial communities using standard techniques (Supplementary Appendix). We  
113 then combined these diverse bacterial populations with the domesticated soil dwelling alga *C.*  
114 *reinhardtii* (Figure 2A). The resulting CES contained a diverse assemblage of bacteria and a

115 single, well characterized, photosynthetic microbial species. We assembled 8 CES using this  
116 method, 4 each from two soil samples (designated “A” and “B”), and inoculated them into a  
117 chemically defined freshwater mimic medium (29) which included organic carbon (glucose),  
118 nitrogen (ammonia) and phosphorous (phosphate, Table S4) to facilitate the initial growth of  
119 the community. We then sealed these communities in vials and placed them in culture devices  
120 like the one shown in Figure 1C and subjected them to 12 h-12 h light-dark cycles for a period  
121 of approximately 50 d.

122 A representative time series of pressure for one of these CES is shown in Figure 2B. We  
123 observed an initial large decline in pressure (Figure 2B, inset) which arose from the rapid bac-  
124 terial respiration of glucose (this decline is not present in CES of algae alone, Figure S4). The  
125 pressure remains approximately 10 % below ambient for 5 to 8 days and then begins to rise  
126 (Figure S5), reflecting the timescale over which we expect algae to grow (30). The rising pres-  
127 sure reflects photosynthetic activity ( $O_2$  production) by the alga before saturating after 8 to 10  
128 days (Figures S2, S5). Once the pressure saturated, we observed stable oscillations in the pres-  
129 sure driven by light-dark cycles. In this regime, during each light phase, the pressure stabilized  
130 within 2 to 3 hours of the illumination being turned on. Therefore, the algae rapidly fix  $CO_2$   
131 early in the light phase before exhausting the inorganic carbon supply later in the light phase.  
132 After  $CO_2$  is depleted during the early periods of the light phase, respiration and photosynthesis  
133 are balanced resulting in stable pressure ( $O_2$  levels) late in the light phase. We conclude that  
134 the respiration is the rate-limiting step in the carbon cycle in our CES, and that light is not lim-  
135 iting algal carbon fixation. During the dark phases of each light-dark cycle, we observe a linear  
136 decrease in pressure with time, indicating a constant rate of respiration during the dark phase  
137 (Figure S6).

138 We observed stable pressure oscillations, with saturating pressure levels during the light  
139 phase and constant respiration rates during the dark phase, for a period of approximately 50 d.

140 During this period, we observe longer timescale dynamics whereby the pressure ( $O_2$ ) levels  
141 slowly drop after about 25 d (7/8 CES, Figure 2B, Figure S5). A detailed analysis of the  $O_2$   
142 dynamics reveals that this decline in pressure coincides with a slowing of the photosynthetic  
143 rates and an increase in the respiration rates (Figure S7). We hypothesize that this results from  
144 the death of a fraction of the algal population which supplies the bacterial community with  
145 additional organic carbon for respiration.

146 We estimated the rate of carbon cycling in each of our 8 CES directly from pressure mea-  
147 surements like the one shown in Figure 2B and the results are shown in Figure 2C. We observe  
148 robust carbon cycling at rates of approximately 10 to nearly 30  $\mu\text{mol d}^{-1}$  in all 8 CES. The  
149 magnitude of this carbon cycling rate is a sizable fraction of the total organic carbon supplied to  
150 each CES at the outset ( $\sim 200 \mu\text{mol}$ , Table S5), and the amount of non-volatile organic carbon  
151 present in each CES at the end of the experiment (120  $\mu\text{mol}$  to 180  $\mu\text{mol}$ , Figure S8). Therefore,  
152 in a period of between 4 and 20 days the amount of carbon cycled approaches the total carbon  
153 in the CES. In this sense, we conclude that the carbon cycling rate in our self-assembled CES  
154 is high. In contrast, in CES comprised of *C. reinhardtii* or *C. reinhardtii* and *E. coli* we observe  
155 carbon cycling rates that are below our detection limit, and  $\sim 4$ -fold lower than the complex  
156 CES, respectively (Figure 2C, green and red circles). We conclude that CES comprised of *C.*  
157 *reinhardtii* and complex soil-derived bacterial communities self-organize to rapidly cycle car-  
158 bon.

159 How do similar carbon cycling rates across CES emerge from bacterial consortia derived  
160 from distinct soil samples? One possibility is taxonomic similarity between assembled bacterial  
161 communities. In this scenario, one or a few similar bacterial taxa would rise to high abundance  
162 potentially due to their ability to utilize the organic carbon produced by *C. reinhardtii* (25).  
163 Another possibility is that taxonomically distinct consortia are maintained in each CES despite  
164 the similar carbon cycling rates, and it is the metabolic capabilities of the assembled bacterial

165 communities that is similar from one CES to the next and not the taxa present. The latter  
166 outcome could arise from functionally redundant bacterial communities (11, 31) that are able to  
167 consume the available organic carbon but are comprised of taxonomically distinct bacteria.

168 To test between these possibilities we performed an enrichment experiment that allowed us  
169 to quantify the taxonomic composition and metabolic properties of our CES, while enriching  
170 communities for those taxa essential for carbon cycling. Each CES was opened, sampled, as-  
171 sayed and diluted 1:20 into fresh medium over three rounds. We chose three rounds of 1:20  
172 dilution to reduce the abundance of any strains not able to grow in our CES by 8000-fold,  
173 putting them below our detection limit by sequencing. Each CES was opened after an initial  
174 50 d period of closure (round 1), and diluted before being sealed to continue the carbon cycling  
175 measurement. At each round, samples were taken from each CES for metabolic assays and  
176 sequencing. The enrichment was performed three times (rounds 2-4) with ~18 day periods of  
177 closure for each round. Carbon cycling rates during each of these enrichment phases are shown  
178 in Figure 2D-E (Figure S9). In most CES, we observed a decline in carbon cycling rates during  
179 the first approximately 10 days of closure before rates stabilize across most CES. We found that  
180 the average cycling rates at the end of each round of dilution do not differ significantly from  
181 one round to the next (Figure 2). However, one of eight CES exhibited a substantial decline in  
182 carbon cycling rates relative to the mean in the final round (CES A.2, yellow curve, Figure 2F).  
183 Further, two CES were diluted and sealed again after round 4 and showed stable cycling for an  
184 additional period of >130 days (Figure S10). We conclude that the carbon cycling is robust to  
185 serial dilution and that our CES can stably cycle carbon for many months.

186 Between each of the four rounds of enrichment (Figure 2C-F) samples were taken from  
187 each of the 8 CES. On each of these samples, we performed 16S amplicon sequencing (V4  
188 hypervariable region) of bacterial communities. Figure 3A shows a time series of the dominant  
189 taxa in all 8 CES across all four rounds of dilution (dominant taxa are those at relative abun-



190 dance above 5 % in any time point). We find that the bacterial communities in our CES differ  
191 strongly from the initial soil samples (Figure S11), indicating that closure and the presence of  
192 algae results in a dramatic re-organization of the soil community. Taxonomically, assembled  
193 CES comprise >5 taxa which make up approximately three quarters of the population in each  
194 community. Some CES exhibit relatively large taxonomic variation from round to round (A.1,  
195 A.2 and A.4), while in others we find that the taxonomic structure of each CES is relatively sta-  
196 ble from round to round (A.2, B.2, B.3, Figure 3A). While all CES from soil sample B harbor  
197 a taxon from the genus *Terrimonas*, the same taxon is only observed in later round of enrich-  
198 ment in one of the four CES from sample A. Further, all CES retain between 80 and 220 rare  
199 taxa (relative abundances <5 %) with the number declining after round 1 (Figure S12). There-  
200 fore, a visual inspection of Figure 3A suggests that there is no obviously conserved taxonomic  
201 structure across our CES. To better quantify this observation, we computed the Jensen-Shannon  
202 divergence (JSD) (32) between the relative abundances in each pair of CES at each round of  
203 enrichment. The JSD quantifies differences in community composition between two communi-  
204 ties and varies between 0 for two identical communities and 1 for two communities that share  
205 no taxa in common. On average, the taxonomic composition differs more between CES (inter-  
206 CES) than it does for the same CES across rounds of enrichment (intra-CES, Figure S13), a  
207 result that is robust to using other community similarity metrics (Figure S14). We also found  
208 that the JSD between CES from different soil samples did not decline across rounds of enrich-  
209 ment (Figure S15), indicating that the taxonomic differences between CES from different soil  
210 samples are retained through the enrichment process. Inter-CES divergences remained larger  
211 than intra-CES divergences even when we grouped taxa with only 90 % 16S sequence similarity,  
212 indicating that there is not taxonomic similarity between CES even at higher levels of classifi-  
213 cation (Figure S16, S17). To visualize community taxonomic composition, we embedded the  
214 JSD between all CES at all rounds into two dimensions using multi-dimensional scaling (MDS)

215 (Figure S18 quantifies the stress of this embedding) and the result is shown in Figure 3B. Note  
216 that the CES remain largely separated from each other in this embedding. Figure 3B supports  
217 our assertion that the taxonomic composition differs strongly from one CES to the next and  
218 that during enrichment these differences are retained. The differences between CES from soil  
219 sample A are larger than those for sample B (Figure S13), but in neither case did we observe  
220 CES converging to a shared taxonomic makeup of the bacterial community. We conclude that  
221 the bacterial communities in our CES differ substantially in their taxonomic composition.

222 The result that the taxonomic structure differs strongly from one CES to the next despite  
223 similar carbon cycling rates supports the idea that carbon cycling in our CES is accomplished  
224 by diverse but functionally redundant bacterial communities. In this case, we hypothesized that  
225 the metabolic capabilities of the assembled bacterial communities might be conserved across  
226 CES. Reasoning that the identity of the organic carbon compounds produced by *C. reinhardtii*  
227 is likely similar across CES, we hypothesized that the carbon utilization capabilities of the  
228 assembled bacterial communities might be similar across CES.

229 To test this hypothesis we measured carbon utilization capabilities on a diverse library of  
230 carbon sources for all CES after each round of enrichment. To accomplish this we used Biolog  
231 96-well EcoPlates (33) which exploit a redox sensitive dye to report respiration in the presence  
232 of 32 diverse carbon sources (including compounds excreted by *C. reinhardtii*, Table S6) each in  
233 triplicate. After each round of dilution we distributed aliquots of each CES into an EcoPlate. We  
234 then incubated the plates and measured dye absorbance, a proxy for carbon utilization, daily for  
235 a period of 4 days. Example absorbance time series are shown in Figure 3C. For each replicate  
236 of each carbon source, we computed a timescale of respiration for that carbon source ( $\tau$ ). To  
237 compute  $\tau$  we took the maximum absorbance detected over the course of the time series, and  
238 then computed the time to reach 90 % of that maximum (dashed lines, Figure 3C). The quantity  
239  $1/\tau$  quantifies the rate at which a CES utilizes a given carbon compound. We averaged  $1/\tau$

240 across the three replicates for each carbon source at each round of enrichment in each CES  
241 (Figure 3D). Each row of Figure 3D shows the average  $1/\tau$  (utilization rate) for a single carbon  
242 source and each column a profile for a CES. Comparing carbon utilization profiles across rounds  
243 reveals a convergence in the metabolic capabilities across our 8 CES, with profiles becoming  
244 more similar across CES as the number of rounds of dilution increases. For example, by the end  
245 of round 4 none of the CES utilize 2-hydroxy benzoic acid despite 6 of 8 CES being capable  
246 of consuming the carbon source after round 1. Conversely, the enrichment process increases  
247  $1/\tau$  for other carbon sources (phenylethylamine, putrecine,  $\gamma$ -amino butyric acid). We note that  
248 the carbon utilization profiles of the enriched CES, after round 4, differ strongly from *E. coli*  
249 (Figure S19) which itself fails to cycle carbon with *C. reinhardtii* (Figure 2C), suggesting that  
250 the carbon utilization capabilities of the complex CES are important for stable carbon cycling.

251 To quantify the variation in the carbon utilization profiles (columns, Figure 3E) across CES  
252 we computed the standard deviation in the rate of carbon utilization ( $1/\tau$ ) for each carbon  
253 source across all CES in each round of enrichment ( $\sigma^i$ , where  $i$  indexes carbon sources). Large  
254 values of this standard deviation indicate large differences in carbon utilization rates across  
255 CES, and small values of this standard deviation indicate similar utilization rates for a given  
256 carbon compound. On average, across all 32 carbon compounds, we observe a decline in the  
257 standard deviation from round 1 to 4 (Figure S20), indicating that the carbon utilization profiles  
258 become more similar across CES. To better visualize this convergence across CES in carbon  
259 utilization profiles, we computed the geometric mean of the  $\sigma^i$  across all carbon compounds  
260 for each round of enrichment. The geometric mean was used since it captures the fractional  
261 change in variation across CES in the utilization rates of each carbon compound. Using this  
262 metric, we observed a substantial decline in the variability in carbon utilization rates across  
263 CES from rounds 1 and 4 (Figure 3E). We conclude that the CES are converging to similar  
264 carbon utilization profiles.

265 The fact that our CES exhibit similar carbon utilization profiles and carbon cycling rates sug-  
266 gests that these CES have been assembled under carbon limitation. Our pressure data show that  
267 photosynthesis by *C. reinhardtii* is CO<sub>2</sub> limited and our media was designed with nitrogen and  
268 phosphorous in excess (Tables S4 and S5). We speculated that the metabolic convergence we  
269 observe in Figure 3E might be a consequence of carbon limitation in our CES, forcing the bac-  
270 terial community to consume specific sets of carbon compounds produced by the algae. Indeed  
271 a control experiment indicates that some of the compounds utilized by the assembled bacterial  
272 communities are excreted by *C. reinhardtii* (Table S6, Supplementary Data 3). However, from  
273 the pressure data or metabolic profiling, we cannot determine the nutrient limiting respiration in  
274 our CES. To address this question we performed an assay after each round of dilution to deter-  
275 mine the nutrient limiting respiration. We used a Microresp assay (Supplementary Appendix)  
276 whereby small aliquots of each CES were dispensed into 96-well plates and supplemented with  
277 carbon, nitrogen or phosphorous. We measured CO<sub>2</sub> production in each sealed well directly  
278 using a pH sensitive dye and compared the results to control wells where no nutrients were  
279 added (Figure S21). We found respiration in our CES was in some cases carbon limited, but in  
280 many instances was phosphorous limited (predominantly in CES from soil sample A). In one  
281 CES, the identity of the limiting nutrient changed from one round to the next (CES A.2, Figure  
282 S21). Therefore, the metabolic convergence we observe across CES arises despite the fact that  
283 respiration is not limited by carbon in all CES. A quantitative analysis of the nutrient budgets in  
284 our CES revealed that phosphorous limitation must arise from phosphate accumulation, either  
285 by bacteria (34) or *C. reinhardtii* (35) and not the incorporation of phosphorous into biomass  
286 (Supplementary Appendix). We conclude that the self-organized carbon cycle in our CES, and  
287 the convergent carbon source utilization repertoire, is robust to changes in the identity of the  
288 nutrient limiting respiration.

289 Our results support the idea that carbon cycling in microbial communities can be sustained

290 with functionally redundant bacterial consortia that exhibit a conserved set of metabolic ca-  
291 pabilities despite variability in their taxonomic structure. Moreover, carbon cycling appears  
292 to be robust to differences in the identity of the nutrient limiting respiration in the CES. The  
293 result points to the idea that the emergent functional property of carbon cycling in microbial  
294 ecosystems is likely to arise from a conserved set of metabolic capabilities (31), that is robust to  
295 variation in taxonomic and nutrient limitation variation of the system. Our data suggest that the  
296 conserved properties of carbon cycling CES are likely carbon utilization pathways and the tax-  
297 onomic diversity in our CES potentially reflects the weak phylogenetic conservation of carbon  
298 utilization phenotypes (36).

299 We have established CES as model systems for understanding how nutrient cycles emerge  
300 from metabolic processes in microbial communities. We propose that the CES studied here  
301 constitute powerful model systems for the detailed study of emergent nutrient cycling in ecosys-  
302 tems. For example, it will be interesting to extend this study to understand how this taxonomic  
303 variability and metabolic convergence impacts the stability of nutrient cycling. Quantifying  
304 abundance dynamics and metabolite exchanges *in situ* should reveal how interactions endow  
305 these communities with stable cycling capabilities, and permit comparing our experiments to  
306 theoretical work on closed ecologies (37–40). Further, the essential exchange of metabolites  
307 between photosynthetic and heterotrophic organisms in our CES means these systems can be  
308 used to study the role of co-evolution in ecosystem function.

## 309 **Acknowledgments**

310 We acknowledge Dr. Karna Gowda for assistance with the microresp assay, James O'Dwyer  
311 and Andrew Ferguson for useful discussions, and Annette Wells for laboratory support. The  
312 Raymond J. Carver Biotechnology Center at the University of Illinois at Urbana-Champaign.  
313 LMJA and ZL acknowledge support from The Center for the Physics of Living Cells graduate  
314 fellowship program (National Science Foundation, PHY 0822613 and PHY 1430124).

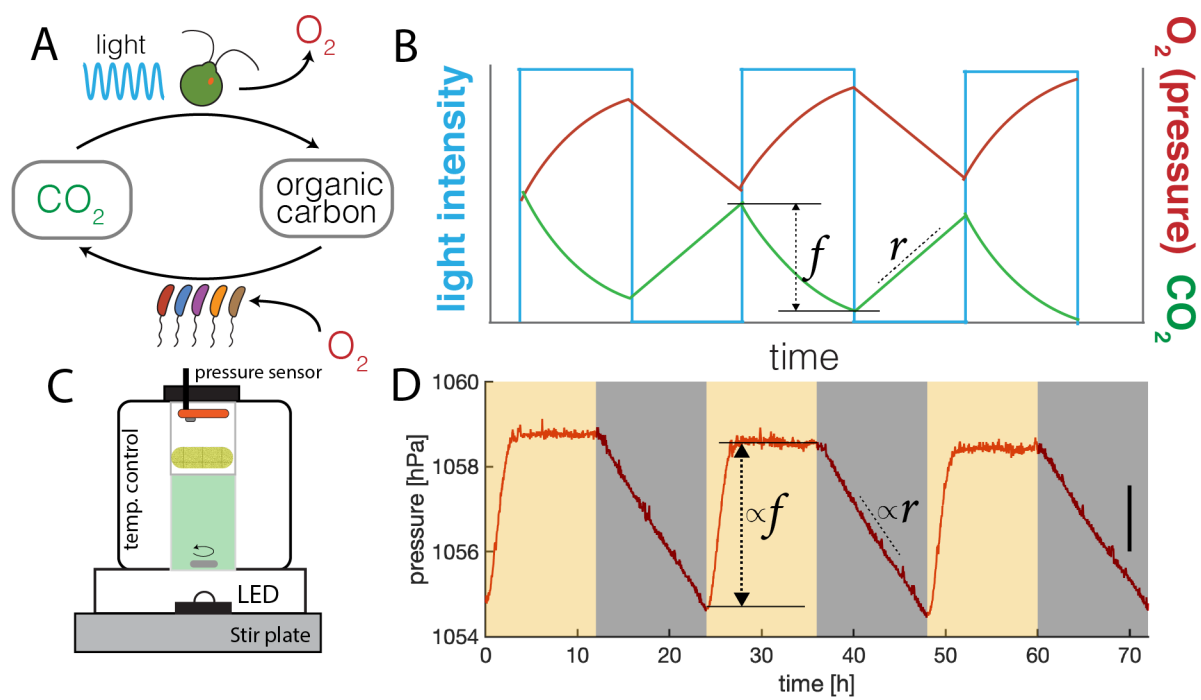

---

Figure 1 (*preceding page*): **Quantifying carbon cycling in closed microbial ecosystems.** (A) Schematic of carbon cycling in closed ecosystems which occurs via photosynthesis utilizing light to fix CO<sub>2</sub> to organic carbon and produce O<sub>2</sub> (top arrow) and respiration which utilizes O<sub>2</sub> and organic carbon to produce CO<sub>2</sub>. (B) Sketch of changes in total O<sub>2</sub> or pressure (red line) and CO<sub>2</sub> (green line) in a CES subjected to cycles of light and dark (blue line). Sketch assumes photosynthetic rate exceeds respiration rate during the light phase.  $r$  is the rate of increase of CO<sub>2</sub> during the dark phase.  $f$  is the net decrease in CO<sub>2</sub> during the light phase. Assuming respiratory and photosynthetic quotients of one, O<sub>2</sub> dynamics mirror CO<sub>2</sub>. Since O<sub>2</sub> is 30-fold less soluble in water than CO<sub>2</sub> changes in pressure quantify changes in O<sub>2</sub> and CO<sub>2</sub> concentrations in a CES (Supplementary Appendix). (C) A schematic of our custom cultivation devices for quantifying carbon cycling in CES using pressure sensors. 20 mL CES are housed in glass vials (40 mL total volume), stirred at 450 rpm, illuminated by an LED and held at 30 °C under feedback temperature control (Supplementary Appendix). A high-precision pressure sensor is integrated into the hermetically sealed cap and a porous foam stopper (yellow) shades the sensor from illumination. (D) Pressure measurements (acquired once per second) in a CES subjected to 12 h-12 h light-dark cycles as indicated by orange and gray shaded regions respectively. Light intensity during the light phase is 150  $\mu\text{mol m}^{-2} \text{s}^{-1}$ . Pressure rises and falls in response to light and dark as expected. The pressure stabilizes during the light phase, indicating that photosynthesis becomes CO<sub>2</sub>-limited. The change in pressure is proportional to  $r$  and  $f$  as labeled. Carbon cycling, computed from these quantities, is proportional to the amplitude of pressure oscillations (Supplementary Appendix). Data in (D) are smoothed with a one minute moving average. A change in pressure of 1.56 hPa (black line, right side) corresponds to a production/consumption of approximately 2  $\mu\text{mol}$  of CO<sub>2</sub> assuming pH 6.5 and photosynthetic/respiratory quotients of 1. (Supplementary Appendix).



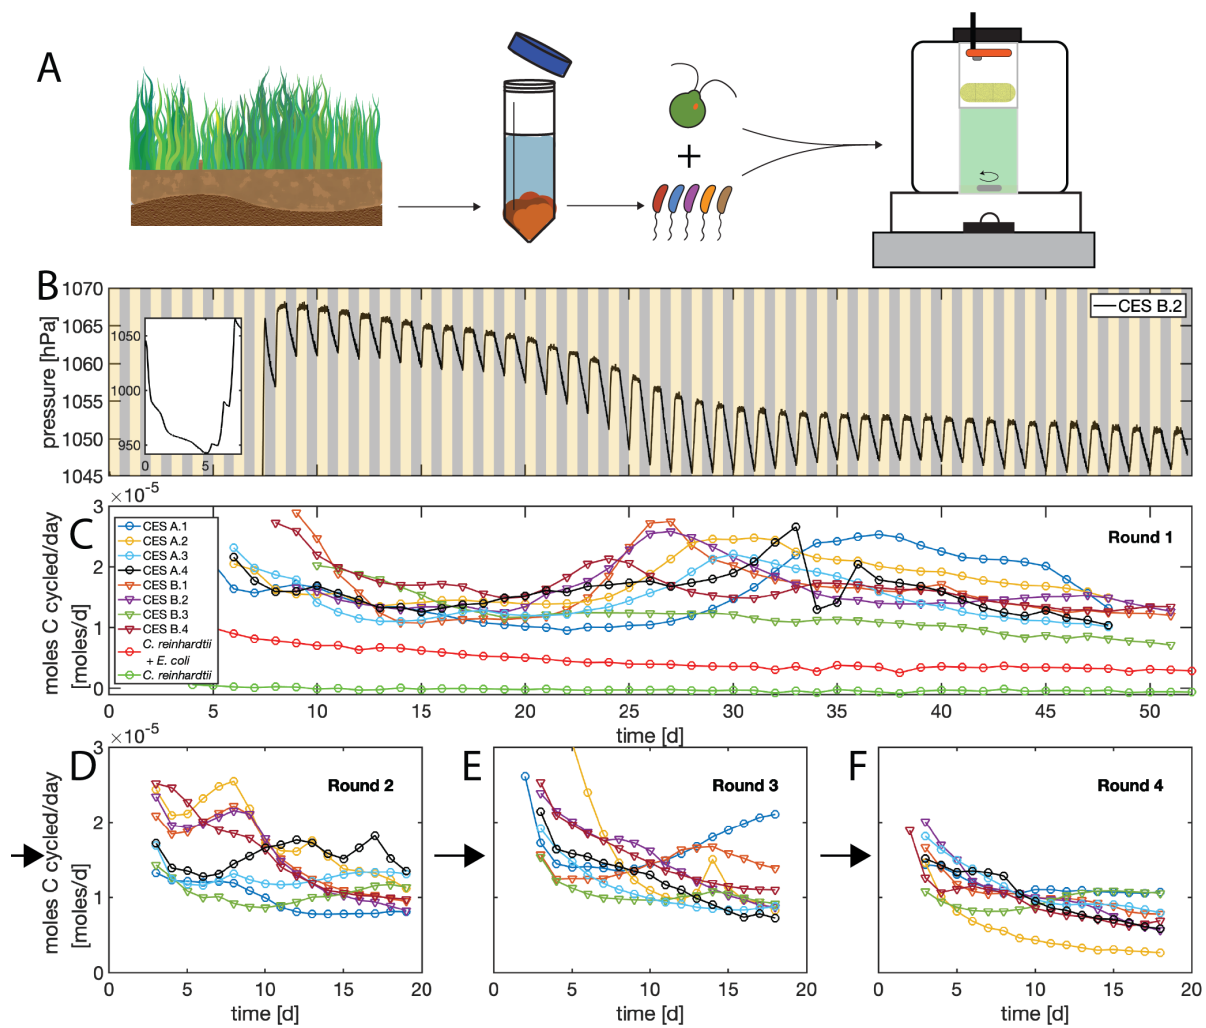

---

Figure 2 (preceding page): **Long-term carbon cycling in closed ecosystems comprised of *Chlamydomonas reinhardtii* and soil-derived bacterial communities.** (A) Top-down assembly of microbial CES. Soil samples are harvested and bacterial communities are extracted. Bacteria are then combined with the alga *C. reinhardtii* and inoculated into the custom culture devices described in Figure 1C. Eight CES were assembled, four each from two soil samples (“A” and “B”) in defined minimal medium, and subjected to 12 h-12 h light-dark cycles (orange/gray shaded regions) for ~50 days while pressure was measured. Light intensity was  $150 \mu\text{mol m}^{-2} \text{s}^{-1}$  during light phase. (B) Pressure measurements performed once per second, smoothed by a one minute moving average, for one of the eight CES. The initial large drop in pressure due to rapid respiration of supplied organic carbon (glucose) is shown in the inset. (C) The rate of carbon cycling (moles/day) for all eight CES is computed from pressure traces as described in the Supplementary Appendix. Carbon cycling rates are only reported after the initial transient phase (inset, panel A) has ended. We assume respiratory and photosynthetic quotients of 1, and a pH of 6.5. Circles indicate CES from soil sample A and triangles from sample B. The transient increase in cycling around 25 to 35 days coincides with a reduction in photosynthetic rates and an increase in respiration (Figure S7). Red and green traces are synthetic CES comprised of *C. reinhardtii* *E. coli* (mean of two replicates) and *C. reinhardtii* (single replicate, Figure S4) as shown in the legend. Statistical errors in estimates of carbon cycling are smaller than the size of the markers. Legend in (C) applied to (D-F). At the end of the acquisition shown in (C) all eight CES were opened, samples were taken and CES were diluted 1:20 into fresh media. CES were then sealed for an additional ~18 d of light-dark cycles and carbon cycling was monitored. (D) Shows carbon cycling rates after the first dilution. Two additional dilution rounds were performed and cycling rates are shown in (E-F) as indicated by the black arrows. The average cycling rates at the end of each round do not differ significantly between rounds of enrichment (p-values: 0.31, 0.87 and 0.053, two-sample t-test between last measurement between rounds 1 and 2, 2 and 3, 3 and 4 respectively)

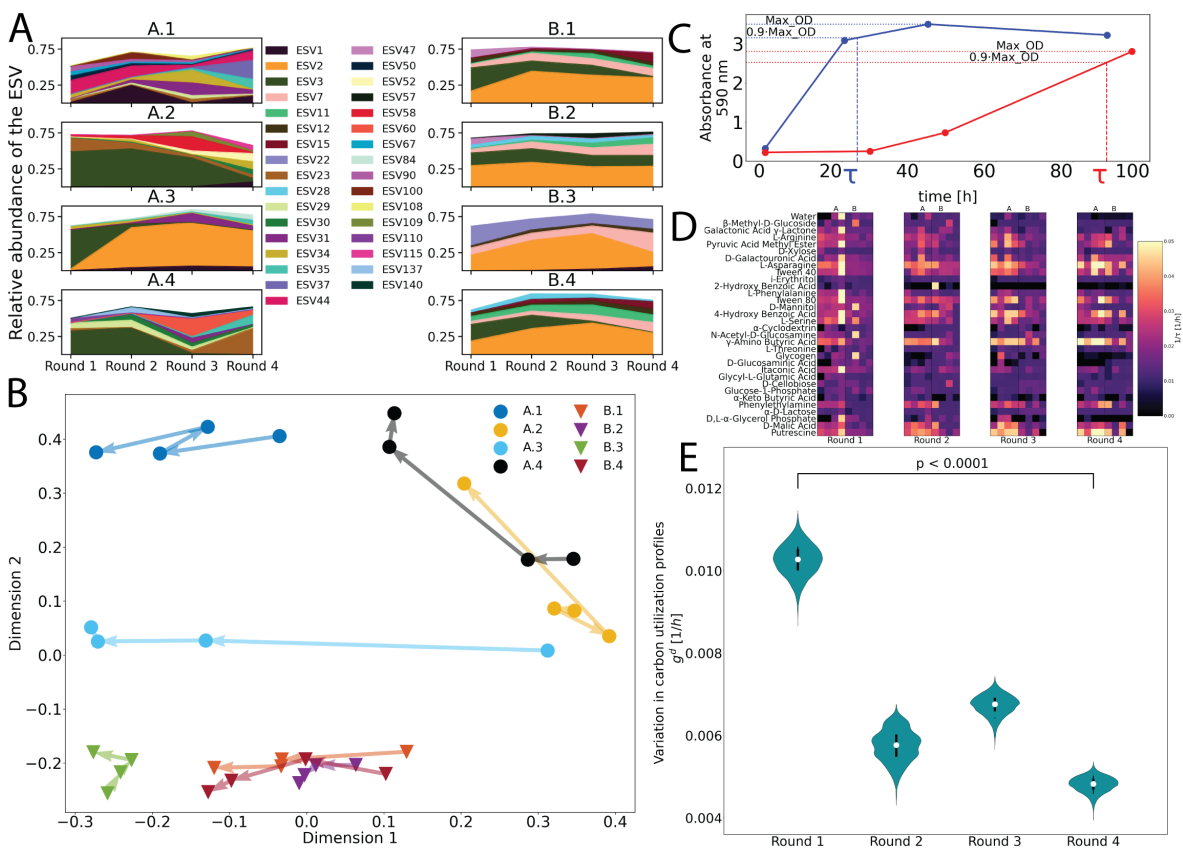

Figure 3 (preceding page): **Divergent taxonomic structure and convergent metabolic capabilities across replicate CES.** (A) Relative abundances measured by 16S rRNA amplicon sequencing of the bacterial taxa comprising the CES (y-axis) for each round of dilution (x-axis). Each exact sequence variant (ESV) is represented by a unique color, indicated in the legend. Only the ESVs that have a relative abundance of 5% or higher in at least one of the four dilution rounds for each CES are shown. Most ESVs belong to unique genera (Figure S24, where multiple ESVs having the same genus are combined). (B) The Jensen Shannon Divergence (JSD) of the relative abundances of all detected taxa at the ESV level is computed between all the 32 CES, as described in the Supplementary Appendix. Multi-dimensional scaling (MDS) is applied to the JSD to embed the data in two dimensions. The circles denote CES derived from soil sample A and the triangles denote CES derived from soil sample B, colors correspond to Figure 2C. The arrows indicate transitions between dilution rounds. (C) Two time series of absorbance (590 nm) indicating respiration in Biolog EcoPlates via the redox sensitive dye tetrazolium (33). For each time series we compute a timescale ( $\tau$ ) by finding the the maximum absorbance (Max\_OD in the figure). We then linearly interpolate between measurements to compute  $\tau$  as the time to reach  $0.9 \times \text{Max\_OD}$ . In the two example measurements shown here, the blue curve reaches its maximum absorbance faster ( $\tau = 23.96$  h), indicating more rapid carbon uptake, while the red reaches it slower ( $\tau = 88.79$  h), indicating a slower utilization of the carbon source. For time series that do not show an increase in  $\text{OD}_{590}$  of at least 0.3 we assume no respiration and set  $\tau \rightarrow \infty$  (Supplementary Appendix). In panels (D-E) we consider the quantity  $\frac{1}{\tau}$ . After each dilution round, we measured  $\frac{1}{\tau}$  for 32 carbon sources, each in triplicate. (D) The carbon respiration profiles of the eight CES are shown here for each dilution round, with carbon sources in rows and CES in columns. Dilution rounds are shown in separate panels (left to right) as labeled below. In each panel, CES from soil sample A are shown on the left and B on the right. Each entry indicates a mean  $\frac{1}{\tau}$  across the three replicate measurements for each carbon source in each CES. Lighter colors indicate faster consumption (smaller  $\tau$ ) of the carbon source. (E) Shows the decline in variability of carbon utilization profiles from rounds 1 to 4. The geometric mean variability in carbon utilization rates is computed as follows. Let  $t_{c,r}^{d,i}$  be the consumption rate of carbon source  $i$  for the  $r^{\text{th}}$  replicate of the  $c^{\text{th}}$  CES at dilution round  $d$  ( $r \in \{1, 2, 3\}$ ,  $c \in \{1, 2, 3, \dots, 8\}$ ,  $i \in \{1, 2, 3, \dots, 32\}$ , and  $d \in \{1, 2, 3, 4\}$ ). For each carbon source at each dilution round we compute  $\sigma^{d,i}(t_{c,r}^{d,i})$ , which is the standard deviation in the carbon utilization rate across all CES ( $c$ ) and replicate measurements ( $r$ ) for each carbon source in a given dilution round. An aggregated measure of variability in carbon utilization rates for each dilution round  $d$  is obtained by computing the geometric mean of  $\sigma^{d,i}$  across carbon sources:  $g^d = (\prod_{i=1}^{32} \sigma^{d,i})^{\frac{1}{32}}$ . This quantity is plotted for each round of enrichment. Errors in  $g^d$  were computed by bootstrap re-sampling each  $t_{c,r}^{d,i}$  (across  $r$ ) 10,000 times to generate 10,000 resampled values of  $g^d$ . To test for significance we compute the difference in the geometric mean between dilution rounds 1 and 4 for each bootstrapped replicate and computed the fraction of differences below zero.

## 315 **References**

- 316 1. P. Falkowski, *et al.*, *Science* **290**, 291 (2000).
- 317 2. J. N. Galloway, *et al.*, *Biogeochemistry* **70**, 153 (2004).
- 318 3. D. E. Canfield, D. J. Des Marais, *Geochimica et Cosmochimica Acta* **57**, 3971 (1993).
- 319 4. B. Mary, S. Recous, D. Darwis, D. Robin, *Plant and Soil* **181**, 71 (1996).
- 320 5. D. E. Canfield, *et al.*, *Science* **330**, 1375 (2010).
- 321 6. P. J. Mulholland, A. D. Steinman, A. V. Palumbo, J. W. Elwood, D. B. Kirschtel, *Ecology*  
322 **72**, 966 (1991).
- 323 7. S. A. Levin, *Ecosystems* **1**, 431 (1998).
- 324 8. M. S. Datta, E. Sliwerska, J. Gore, M. F. Polz, O. X. Cordero, *Nature Communications* **7**  
325 (2016).
- 326 9. J. E. Goldford, *et al.*, *Science (New York, N.Y.)* **361**, 469 (2018).
- 327 10. J. Friedman, L. M. Higgins, J. Gore, *Nature Ecology & Evolution* **1**, 1 (2017).
- 328 11. A. S. Fernandez, *et al.*, *Applied and Environmental Microbiology* **66**, 4058 (2000).
- 329 12. J. A. Christie-Oleza, D. Sousoni, M. Lloyd, J. Armengaud, D. J. Scanlan, *Nature Microbi-*  
330 *ology* **2**, 17100 (2017).
- 331 13. E. Pagaling, *et al.*, *Environmental Microbiology* **19**, 3374 (2017).
- 332 14. D. E. Dykhuizen, D. L. Hartl, *Microbiological Reviews* **47**, 150 (1983).
- 333 15. E. H. Wintermute, P. A. Silver, *Molecular Systems Biology* **6**, 407 (2010).

- 334 16. C. K. Obenhuber, C. E. Folsome, *BioSystems* **21**, 165 (1988).
- 335 17. F. B. Taub, A. K. McLaskey, *Advances in Space Research* **51**, 812 (2013).
- 336 18. F. B. Taub, *Annual Review of Ecology and Systematics* **5**, 139 (1974).
- 337 19. K. Matsui, S. Kono, A. Saeki, N. Ishii, M.-G. Min, *Hydrobiologia* **435**, 109 (2000).
- 338 20. E. A. Kearns, C. E. Folsome, *BioSystems* **14**, 205 (1981).
- 339 21. M. C. Rillig, J. Antonovics, *Proceedings of the National Academy of Sciences* **116**, 11093  
340 (2019).
- 341 22. M. Kliss, *et al.*, *Advances in Space Research* **14**, 61 (1994).
- 342 23. D. R. Hekstra, S. Leibler, *Cell* **149**, 1164 (2012).
- 343 24. Z. Frenzt, S. Kuehn, S. Leibler, *Physical Review X* **5**, 041014 (2015).
- 344 25. M. B. Allen, *Archiv fr Mikrobiologie* **24**, 163 (1956).
- 345 26. H. T. Odum, *Limnology and Oceanography* **1**, 102 (1956).
- 346 27. J. Merritt, S. Kuehn, *Scientific Reports* **6**, 33173 (2016).
- 347 28. S. G. Ball, L. Dirick, A. Decq, J.-C. Martiat, R. Matagne, *Plant Science* **66**, 1 (1990).
- 348 29. F. B. Taub, A. M. Dollar, *Limnology and Oceanography* **13**, 607 (1968).
- 349 30. H. Mickalide, S. Kuehn, *Cell Systems* **9**, 521 (2019).
- 350 31. S. Louca, *et al.*, *Nature Ecology & Evolution* **1**, 0015 (2017).
- 351 32. O. Koren, *et al.*, *PLoS computational biology* **9**, e1002863 (2013).

- 352 33. B. R. Bochner, M. A. Savageau, *Applied and Environmental Microbiology* **33**, 434 (1977).
- 353 34. T. Mino, M. C. M. van Loosdrecht, J. J. Heijnen, *Water Research* **32**, 3193 (1998).
- 354 35. Y. Komine, L. L. Eggink, H. Park, J. K. Hooper, *Planta* **210**, 897 (2000).
- 355 36. A. C. Martiny, K. Treseder, G. Pusch, *The ISME journal* **7**, 830 (2013).
- 356 37. R. E. Ulanowicz, *Journal of Theoretical Biology* **34**, 239 (1972).
- 357 38. D. L. DeAngelis, *Ecology* **61**, 764 (1980).
- 358 39. M. Loreau, *Journal of Theoretical Biology* **168**, 237 (1994).
- 359 40. R. M. Nisbet, J. McKinsty, W. S. C. Gurney, *Mathematical Biosciences* **64**, 99 (1983).

## 360 **Supplementary materials**

361 Supplementary Appendix

362 Figs. S1 to S24

363 Tables S1 to S6

364 References (41-72)
